# Supplementary material
Source: PubMed Central journal article supplement (PMC6442974)
Supplement: 2018_197277-Disclosures_and_Contributions.pdf [file 2018_197277-Disclosures_and_Contributions.pdf]

Haematologica  
HAEMATOL/2018/197277  
Version 3

Extramedullary acute myeloid leukemia presenting in young adults  
demonstrates sensitivity to high dose anthracycline: subset analysis  
from ECOG-ACRIN 1900

Hugo F. Fernandez, Zhuoxin Sun, Mark R. Litzow, Selina M. Luger,  
Elisabeth Paietta, Janis Racevskis, Ross L. Levine, Jay P. Patel, Omar  
Abdel-Wahab, Rhett P. Ketterling, Gordon W. Dewald, John M.  
Bennett, Jacob M. Rowe, Hillard M. Lazarus, and Martin S. Tallman

Disclosures: This study was coordinated by the ECOG-ACRIN Cancer Research Group (Peter J. O'Dwyer, MD and Mitchell D. Schnall, MD, PhD, Group Co-Chairs) and supported by the National Cancer Institute of the National Institutes of Health under the following award numbers: CA180820, CA180794, CA180790, CA180791, CA180853, and CA189859. The content is solely the responsibility of the authors and does not necessarily represent the official views of the National Institutes of Health, nor does mention of trade names, commercial products, or organizations imply endorsement by the U.S. government.

Contributions: H.F.F, M.R.L., S.M.L., J.M.R., H.M.L. and M.S.T. designed and performed research, wrote and edited the paper. Z.S. analyzed the data and edited the paper. E.M.P. performed diagnostic studies, analyzed data and edited the paper. J.M.B provided pathologic review. J. R., R.L.L, J.P.P, O.A-W. performed the molecular studies. G.D and R.P.K. performed the cytogenetic studies. There are no financial conflicts of interest.
